# Supplementary material
Source: publisher site journal article supplement (https://www.dovepress.com/article/359950)
Supplement: Supplementary file 1 [file get_supplementary_file.php]

**
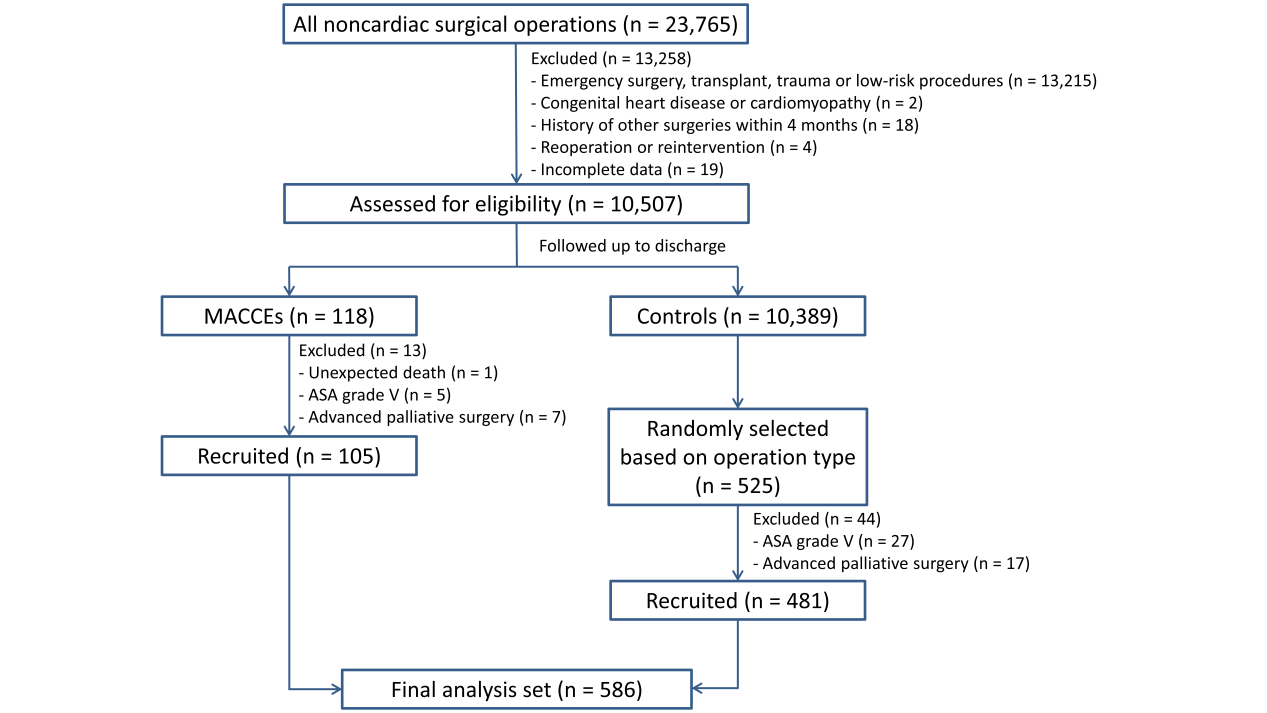
**

**Fig. S1** Flow chart of recruited patients. MACCEs: Major adverse cardiovascular and cerebrovascular events.
